# Supplementary material for: One-Year Progression and Risk Factors for the Development of Chronic Kidney Disease in Septic Shock Patients with Acute Kidney Injury: A Single-Centre Retrospective Cohort Study
Source: J Clin Med. 2018 Dec 15;7(12):554. doi: 10.3390/jcm7120554 (PMC6306914; doi:10.3390/jcm7120554)
Supplement: Supplementary file 1 [file jcm-07-00554-s001.pdf]

**Supplementary 1. Univariate logistic regression of factors associated with the occurrence of CKD after 1 year including follow-up loss patients (sensitivity analysis).**

| Discharge Creatine level    | Univariate analysis |               |          |
|-----------------------------|---------------------|---------------|----------|
|                             | OR                  | 95% CI        | <i>p</i> |
| All CKD                     | 1.915               | 1.351 – 2.714 | < 0.001  |
| No CKD                      | 1.550               | 1.174 – 2.047 | 0.002    |
| Partial CKD (20% incidence) | 1.449               | 1.120 – 1.874 | 0.005    |

Abbreviations: OR = odds ratio; CI = confidence interval; CKD = chronic kidney injury.
